## **Change in body weight of older adults before and during the COVID-19 pandemic:**

### **Longitudinal results from the Berlin Aging Study II**

Valentin Max Vetter<sup>1</sup>, Johanna Drewelies<sup>2,3</sup>, Sandra Düzel<sup>4,5</sup>, Jan Homann<sup>6</sup>, Lil Meyer-Arndt<sup>7, 8, 9</sup>, Julian Braun<sup>7</sup>, Anne Pohrt<sup>10</sup>, Friederike Kendel<sup>11</sup>, Gert G. Wagner<sup>12, 13</sup>, Andreas Thiel<sup>7</sup>, Lars Bertram<sup>14</sup>, Vera Regitz-Zagrosek<sup>15,16</sup>, Denis Gerstorff<sup>3</sup>, & Ilja Demuth<sup>1,7</sup>

<sup>1</sup>Charité – Universitätsmedizin Berlin, corporate member of Freie Universität Berlin and Humboldt-Universität zu Berlin, Department of Endocrinology and Metabolic Diseases (including Division of Lipid Metabolism), Biology of Aging working group, Augustenburger Platz 1, 13353 Berlin, Germany

<sup>2</sup>Lise Meitner Group for Environmental Neuroscience, Max Planck Institute for Human Development, Berlin, Germany.

<sup>3</sup>Department of Psychology, Humboldt University Berlin, Berlin, Germany.

<sup>4</sup>Max-Planck Institut für Bildungsforschung

<sup>5</sup>Friede Springer Cardiovascular Prevention Center; Charité – Universitätsmedizin Berlin (CBF), Berlin, Germany

<sup>6</sup>Institute of Epidemiology and Social Medicine, University of Münster, Münster, Germany

<sup>7</sup>Charité - Universitätsmedizin Berlin, corporate member of Freie Universität Berlin, Humboldt-Universität zu Berlin, and Berlin Institute of Health, Regenerative Immunology and Aging, BIH Center for Regenerative Therapies, 13353 Berlin, Germany

<sup>8</sup>Charité – Universitätsmedizin Berlin, corporate member of Freie Universität Berlin, Humboldt-Universität zu Berlin, and Berlin Institute of Health, NeuroCure Clinical Research Center, 10117 Berlin, Germany

<sup>9</sup>Charité – Universitätsmedizin Berlin, corporate member of Freie Universität Berlin, Humboldt-Universität zu Berlin, and Berlin Institute of Health, Department of Neurology with Experimental Neurology, 10117 Berlin, Germany

<sup>10</sup>Department of Medical Biometrics, Charité - Universitätsmedizin Berlin, corporate member of Freie Universität Berlin, Humboldt-Universität zu Berlin, and Berlin Institute of Health, Berlin, Germany.

<sup>11</sup>Gender in Medicine, Charité - Universitätsmedizin Berlin Corporate Member of Freie Universität Berlin and Humboldt-Universität zu Berlin, Berlin, Germany.

<sup>12</sup>German Socio-Economic Panel Study (SOEP), German Institute for Economic Research (DIW), Berlin, Germany

<sup>13</sup>Center for Lifespan Psychology, Max Planck Institute for Human Development, Berlin, Germany

<sup>14</sup>Lübeck Interdisciplinary Platform for Genome Analytics (LIGA), University of Lübeck, Lübeck, Germany.

<sup>15</sup>Institute for Gender in Medicine, Center for Cardiovascular Research, Charité – Universitätsmedizin Berlin, Corporate Member of Freie Universität Berlin, Humboldt—Universität zu Berlin and Berlin Institute of Health, Berlin, Germany.

<sup>16</sup>Department of Cardiology, University Hospital Zürich, University of Zürich, Zürich, Switzerland.

**Corresponding author:**

Ilja Demuth (Ph.D.)

Charité - Universitätsmedizin Berlin

Lipid Clinic at the Interdisciplinary Metabolism Center,

Biology of Aging Group

Augustenburger Platz 1

13353 Berlin

Email: [ilja.demuth@charite.de](mailto:ilja.demuth@charite.de)

Phone: ++49 30 450 569 143

FAX: ++49 30 450 566 904

## **Abstract**

**Background:** Change in body weight during the COVID-19 pandemic as an unintended side effect of lockdown measures has been predominantly reported for younger and middle-aged adults. However, information on older adults for which weight loss is known to result in adverse outcomes, is scarce.

**Aims:** Describe body weight change in older adults before, during, and after the COVID-19 lockdown measures and explore putative associated factors with a focus on the period that includes the first six months of the COVID-19 containment measures.

**Methods:** In this study, we analyzed the longitudinal weight change of 472 participants of the Berlin Aging Study II (mean age of 67.5 years at baseline, average follow-up time 10 years). Additionally, differences between subgroups characterized by socio-economic, cognitive, and psychosocial variables as well as morbidity burden, biological age markers (epigenetic clocks, telomere length), and frailty were compared.

**Results:** On average, women and men lost 0.87% (n=227) and 0.5% (n=245) of their body weight per year in the study period covering the first six months of the COVID-19 pandemic. Weight loss among men was particularly pronounced among groups characterized by change in physical activity due to COVID-19 lockdown, low positive affect, premature epigenetic age (7-CpG clock), diagnosed metabolic syndrome, and a more masculine gender score (all variables:  $p < 0.05$ , n=245).

**Conclusions:** Older participants lost weight with a 2.5-times (women) and 2-times (men) higher rate than what is expected in this age.

## **Introduction**

The outbreak of the novel severe acute respiratory syndrome coronavirus 2 (SARS-CoV-2) was declared to be a public health emergency of international concern on January 30<sup>th</sup>, 2020, by the World Health Organization (WHO) [1]. To contain its spread, non-pharmaceutical interventions (NPIs) were implemented by governments across the world [1-3] as numbers of cases and deaths were rising. They included, among others, closing of schools, social distancing, and lockdowns on the population level [4]. In Berlin, Germany, the first SARS-CoV 2 positive patient was registered on March 1<sup>st</sup>, 2020. Gradually increasing restrictions were subsequently imposed in Berlin and culminated in the first full lockdown in mid-March and April 2020 [5, 6]. A second lockdown was in effect between November 2020 and April 2021. However, the degree of restrictions varied within and across the lockdown periods and different rules applied to persons with a negative Sars-CoV-2 test.

While lockdowns proved, at least for the most part, to be effective in keeping the number of Sars-Cov-2 infections low [3, 4, 7], other effects of NPIs, both beneficial and adverse, were reported. For example, while unfavorable nutritional habits (e.g., an increase in consumption of comfort food and alcohol) seemed to be predominant, beneficial dietary changes (e.g., increased consumption of fresh produce and home cooking) were also reported (reviewed in [8] and [9]). Body weight was one important anthropometric measure that was potentially impacted by these changes in dietary behavior, but potentially also by psychosocial stress, mobility restrictions, individual predispositions, and other factors associated with social restrictions or COVID-19 itself [8, 10-15]. To quantify this effect, several studies analyzing body weight during the time of the COVID-19 pandemic and associated lockdown measures have been published (reviewed in [9, 14-16]). However, almost all of these studies (except for [10, 17]) relied on cross-sectional data only. Furthermore, only two studies examined older adults, here defined as individuals with a mean age above 65 years [11, 17]. This type of data are needed because earlier reports have demonstrated both an increase of malnutrition during

lockdown measures among older adults [17] and that low body weight [18] and especially weight loss [18, 19] are associated with higher mortality in this vulnerable group (obesity paradox [18]).

In this study, we aimed to close this knowledge gap by describing the longitudinal change of body weight in participants of the Berlin Aging Study II (BASE-II [20]) before, during, and after the time COVID-19 lockdown measures were implemented. In a second step, we explore differences in body weight change between subgroups characterized by variables known or hypothesized to be associated with healthy aging or body weight.

## Methods

### *Study Population*

The Berlin Aging Study II (BASE-II) is a multicenter interdisciplinary study with the goal to identify health-promoting factors in old age [20]. Baseline examination (T0) of 1,671 older participants in the medical part of the study (mean age: 68.8 years, sd: 3.7 years, 51.6% women) was conducted between 2009 and 2014. Between 3.9 and 10.4 years later (mean 7.4 years, sd = 1.5 years) a follow-up examination of 1,083 participants (+ 17 additional participants) as part of the GendAge study (T1) [21] was conducted. This examination (T1) took place between June 22<sup>nd</sup> 2018 and March 10<sup>th</sup> 2020, thereby was completed shortly before the start of local COVID-19-restrictions. Six months into the COVID-19 pandemic an online survey was sent out to the participants. At the time the online survey was conducted, none of the participants reported to have had a COVID-19 since the beginning of the pandemic. In the final dataset, 472 participants provided information on their body weight at T0, T1 and online survey (Figure 1B).

A second medical follow-up examination (T2) began in February 2021 and was completed in July 2023 as part of the Charité Corona Cross study. Because we focused on COVID-19-pandemic lockdown associated changes in this study, we included only participants who were examined before August 8<sup>th</sup>, 2022 (T2a) in our analyses. However, this choice was arbitrary as no meaningful cut-off is available. A sample of 228 participants was available that provides information on all four time-points (T0, T1, online survey, and T2a, see Figure 1B).

Potential bias due to non-random loss to follow-up was examined (Supplementary Table 1). If any, only very limited selection bias is observable in the variables examined here.

This manuscript was created in accordance with the STROBE guidelines [22, 23].

### *Body weight*

Participants were asked to report their body weight as part of a questionnaire (in kilogram with one or no decimal places). Additionally, body weight was measured at T0 and T1 (after the self-reported weight has been recorded) with the electronic measuring station seca 763 (SECA, Germany) in kilogram with two decimal places. To improve comparability between all four timepoints, the self-reported weight was used for all subsequent analyses. The participant's individual weight change between two consecutive timepoints was calculated as annual percentage change making use of an exponential growth function known as compound annual growth rate (CAGR):

$$CAGR(t_0, t_1) = \left( \left( \frac{w_1}{w_0} \right)^{\frac{1}{t_1 - t_0}} - 1 \right) * 100$$

where  $w_0$  is the initial weight (in kg) at timepoint  $t_0$  which is followed by the consecutive measurement of body weight  $w_1$  at timepoint  $t_1$ . The time difference between body weight assessments  $t_1 - t_0$  was calculated as difference between age in years at time of assessment.

#### *Additional Variables*

All additional variables, except self-reported change in physical activity (PA) due to COVID-19, were assessed at the first follow-up examination (T1) that was completed just before the pandemic started. A more in-depth description on how these variables were assessed can be found in the Supplementary Methods and Supplementary Table 2.

*General Characteristics:* Biological sex was assessed dichotomously as "man" or "women". To separate the effects of socially constructed gender from sex a "gender score" was recorded. This score aggregates information on central gender dimensions. Lower values indicate more traditionally male characteristics (for more details see [24]). Cohabitation was derived from several questions about the participant's household and living situation (further information in Supplementary Methods). BMI at T1 was calculated as measured weight (in kg) divided by

squared height (in m). Education was measured in number of years (7 to 18 years). Income was assessed in eighteen categories as part of the self-administered questionnaire.

*Physical Activity (PA)*: Participants were asked to rate themselves as “active” or “rarely/never active” (reported as “not active” of the variable “Physically Active” in this study) as part of the Rapid Assessment of Physical Activity (RAPA) [25] questionnaire. Additionally, PA was measured with the wGT3X-BT activity monitor (ActiGraph LLC, USA) and reported as Vector Magnitude (VM) count [26]. Participants were asked to report change in their PA that specifically needs to be attributed to the COVID-19 pandemic as part of the online survey six months into the pandemic.

*Cognitive performance, Hand Grip Strength and Frailty*: Cognitive performance, specifically perceptual speed, was assessed by the Digit Symbol Substitution Test (DSST) [27]. Muscle strength was assessed as hand grip strength, and pre-specified cut-off values were used to define impairment [28, 29]. Frailty indices were calculated following the approach by Fried and colleagues [29] as well as the deficit accumulation approach implemented in the SPRINT study [30].

*Cardiovascular Risk and Chronic Disease*: Ten-year risk for cardiovascular disease was calculated with the SCORE2 and SCORE2-OP instrument [31, 32] (hereinafter referred to as SCORE2). Type 2 Diabetes Mellitus (T2D) was diagnosed based on the criteria defined by the American Diabetes Association (ADA) guidelines [33]. Metabolic syndrome was diagnosed according to the American Heart Association/ International Diabetes Federation/ National Heart, Lung, and Blood Institute criteria 2009 [34]. Kidney function was determined by estimating the glomerular filtration rate (eGFR) based on cystatin C using the CAPA



equation [35]. To get a more general estimation of the participants morbidity, an adapted version [36] of Charlson's morbidity index [37] was calculated.

*Biomarkers of Aging:* The 7-CpG clock [38] and GrimAge clock [39] DNA methylation age (DNAmA) were measured in EDTA blood samples collected at the first follow-up. DNAmA acceleration (DNAmAA) was calculated as leukocyte-adjusted residuals of a linear regression of DNAmA on chronological age (for details please [40]). Telomere length was estimated with a recently published algorithm from epigenome-wide methylation data [41].

*Psychosocial Resources:* Affect was assessed by the Positive and Negative Affect Schedule (PANAS-X [42]) [43]. The UCLA Loneliness Scale [44] was used to assess loneliness [45]. A 3-item subscale of the short version of the Big Five Inventory (BFI) [46] was used to assess conscientiousness [47]. Perception of stress was assessed by eight items of the Perceived Stress Scale (PSS) [48]. Participants answered the questions on a scale from 1 (“never”) to 5 (“very often”).

#### *Missing Values*

In the final dataset, 5.2% of data was missing and subsequently imputed with R's mice package [49] (20 imputed datasets, 5 iterations). Convergence of the imputation algorithm as well as distribution and proportions of imputed variables were inspected visually. As part of a sensitivity analysis, we re-ran our models using the original (not-imputed) dataset which revealed a highly comparable pattern of results (Supplementary Figure 5 and 6).

#### *Statistical Analyses*

All statistical analyses were conducted in R, version 4.2.1 [50] and figures were drawn with R's “ggplot2” package [51]. Mean difference between groups as well as 95% confidence

intervals and p-values for two-sided two-sample t-tests were calculated. Continuous variables were dichotomized to allow a more easy and intuitive comparison.

## Results

### *Participants*

In this study we analyzed 472 BASE-II participants that provided information on their body weight at three timepoints. After the baseline examination (2009-2014, T0), the first follow-up examination (T1) was conducted on average 7.4 years later and was completed just before the beginning of the pandemic. The third data assessment was conducted as an online survey six months into the pandemic. To examine how the weight of the participants developed subsequently, we analyze a subsample of 228 participants who were followed-up a fourth time on average about 1 year later (T2a).

Mean age at T0, T1, online survey, and T2a were 67.5, 74.8, 76.3, and 77.4 years. About half of the study sample are women (48%). Follow-up time between T0 and T1, T1 and online survey, and online survey and T2a were 7.3, 1.5, and 1.1 years. Self-reported and measured weight correlated highly at T0 ( $r=0.98$ ) and at T1 ( $r=0.99$ , Figure 2 B and C), suggesting a high degree of comparability between self-reported and objectively measured weight.

### *Change in body weight*

Mean change of body weight per year in percent (compound annual growth rate, CAGR) between T0 and T1 was -0.17% for men and -0.04% for women (Supplementary Table 2). Between T1 and the online survey (mean follow-up time = 1.5 years, SD = 0.47 years), which is the period that covers the first six months of the COVID-19 pandemic in Berlin as well as associated lockdown measures and restrictions, men lost on average 0.5% and women lost on average 0.87% of their body weight per year. In the period following the online survey in which lockdown measures were generally less strict, men gained 0.93% of body weight while women continued to lose on average 0.02% per year (Table 1, Figure 3). Descriptive statistics of the sample of participants who provided data at only three time points ( $n=472$ ) is provided in Supplementary Table 2.

Only very few participants switched weight quartiles between T1, Online Survey, and T2a. This indicates that the weight changes between timepoints were not the result of extreme changes of only a few individuals but result from the change of the whole study population (Supplementary Figure 1).

Cross-sectionally, age was not correlated with body weight in men ( $r < 0.05$ ) and only modestly correlated in women ( $r = -0.2$ , Supplementary Figure 2 B). Individual weight trajectories are visualized in Supplementary Figure 2 A.

#### *Comparison of change in body weight between specific subgroups*

To further explore changes in body weight, in a first step we analyzed differences between participants who reported to have changed their physical activity levels due to COVID-19 lockdown measures assessed in an online survey six months into the COVID-19 epidemic and those who reported no change. While no statistically significant weight change differences were found in women (ANOVA,  $p = 0.47$ ), men who reported to have increased (mean = -1.5%,  $n = 18$ ) and reduced PA (mean = -1.2%,  $n = 69$ ) differed statistically significantly in their weight change (CAGR) from men who reported to not have changed their PA (mean = -0.1%,  $n = 157$ ) due to COVID-19 lockdown measures (Figure 2 A).

In a second step we aimed to describe differences in body weight change between subgroups that were defined by variables assessed at the first follow-up examination which was completed just before the first COVID-19 lockdown measures were implemented (T1). Descriptive statistics of analyzed variables can be found in Supplementary Table 1.

In women no statistically significant difference between weight change was found when comparing subgroups. Male participants with lower values in positive affect, premature biological aging (7-CpG epigenetic clock), diagnosed metabolic syndrome, and a lower gender score (more masculine) lost significantly more weight than participants in the comparison group (Figure 4).

The combined analysis of women and men is shown in Supplementary Figures 3 and 4. Additionally, Pearson's correlations coefficients between weight change (between T1 and online survey) and continuously measured variables of interest at T1 are shown in Supplementary Figure 7.

## Discussion

In this study, we assessed the change in body weight before, during and after COVID-19 lockdown measures in an otherwise healthy elderly (age >65years) cohort from Berlin, Germany. Weight loss in the period covering the first six months of the COVID-19 pandemic was 2.5-times (women) and 2-times (men) higher than expected in this age group according to a large dataset of participants from Austria (n=185,192 [52]). Interestingly, after the initial six months of the pandemic, the women's weight was almost stable (on average -0.02% of body weight per year) and men even gained on average 0.93% of body weight per year eventually reaching their average body weight that was assessed at the examination prior to the pandemic (Table 1). A lower than expected body weight is of concern because it was shown to be associated with increased mortality [18]. Furthermore, unintended weight loss is part of the well-established Fried frailty phenotype [29].

Our findings contrast with the only other study examining a healthy study sample with a mean age of more than 65 years. DiSanto and colleagues who found in a survey conducted with 128 participants between 60 and 87 years that 35% reported weight gain and 11% reported weight loss during the time COVID-19 containment measures were in place[11]. One recent systematic review on the change of body weight and BMI during the first COVID-19 lockdown period identified 36 eligible studies [14]. The authors of the systematic review suggested that the focus on younger people in the literature might be the result of the data collection and recruitment methods which were predominantly online and therefore potentially were less accessible for older adults [15]. This illustrates that, although this topic is of high interest, data on the group of older adults is scarce.

In a second step, we compared change in body weight between different subgroups in our sample. Men who reported to have changed their PA (either increased or reduced PA) due to COVID-19 lockdown measures had lost significantly more body weight compared to those who did not change their PA levels. Furthermore, statistically significant differences in body

weight change were found for men between groups characterized by positive affect, epigenetic age (7-CpG clock), metabolic syndrome and socially constructed gender (gender score). We note that these findings result from explorative analyses, and therefore cannot be used for prediction or causal inferences without further independent validation.

There are several limitations to this study. First, as with every longitudinal study, evaluation of potential bias due to loss to follow-up poses a challenge. However, a comparison of the subsample of participants providing information at all three timepoints (n=472) with the complete sample at baseline shows no large deviation (Supplementary Table 1). Second, although body weight of participants was measured with an electronic scale at T0 and T1, only self-reported body weight was available at all four timepoints. However, we are confident that this has only limited impact on the results of our study as the correlation between objectively measured and self-reported weight (which was recorded before body weight was measured) at T0 and T1 was very high. At the same time, we cannot rule out context effects. At the study site, participants may have reported more accurate weights because they expected a subsequent objective assessment, whereas it was clear to them that the online questionnaire would not involve any objective verification. A third limitation to this study is the above-average health, educational level and income of this particular dataset as described before [20] limiting the generalizability of the results. Furthermore, participants of BASE-II might have access to coping strategies that are not available to other parts of the population, resulting potentially in underestimating the adverse effects observed in this study. Fourth, because of the explorative nature of our analyses, we did not adjust for multiple testing. Therefore, an independent validation of our results is needed before final conclusion can be drawn.

Strengths of this study include the well characterized large cohort of older adults. The high quality of assessed data at four examinations of which the second just ended before the first COVID-19 cases were reported in Berlin allows a detailed description of weight change.

Additionally, the wide range of variables that is available in the BASE-II allows a comprehensive explorative analysis of different aspects and individual levels of functionality.



## **Conclusion**

Change in body weight in the study period covering the first 6 months of the COVID-19 pandemic were about 2.5- (women) and 2-times (men) higher than what would be expected in this age group. Body weight change in men differed statistically significantly between subgroups characterized by change of PA due to COVID-19 lockdown, positive affect, biological age (7-CpG clock), metabolic syndrome, and gender score. Although these descriptive results need to be validated independently, they point to interesting candidate markers for future studies.

### **Ethics approval and consent to participate**

All participants gave written informed consent. All medical assessments were conducted in accordance with the Declaration of Helsinki and approved by the Ethics Committee of the Charité – Universitätsmedizin Berlin (approval numbers EA2/029/09, EA2/144/16, and EA2/224/21) and were registered in the German Clinical Trials Registry as DRKS00009277 and DRKS00016157 (BASE-II and GendAge).

### **Consent for publication**

Not applicable.

**Availability of data and materials:** Due to concerns for participant privacy, data are available only upon reasonable request. Please contact Ludmila Müller, scientific coordinator, at [lmuller@mpib-berlin.mpg.de](mailto:lmuller@mpib-berlin.mpg.de), for additional information.

### **Competing interests**

The authors declare that they have no competing interests.

### **Funding statement**

This article uses data from the Berlin Aging Study II (BASE-II) and the GendAge study which were supported by the German Federal Ministry of Education and Research under grant numbers #01UW0808; #16SV5536K, #16SV5537, #16SV5538, #16SV5837, #01GL1716A and #01GL1716B. This work was also funded by the Deutsche Forschungsgemeinschaft (DFG, German Research Foundation) – 460683900.

### **Author contributions**

Conceived and designed the study: V.M.V and I.D. Contributed study-specific data: V.M.V., J.D, S.D., J.H., J.B. L.M.-A., A.P., F.K., G.G.W., A.T., L.B., V.R.-Z., D.G. and I.D. Analyzed the data: V.M.V. Wrote the manuscript: V.M.V and I.D. All authors revised and approved the manuscript.

## References:

1. Organization, W.H. *Listings of WHO's response to COVID-19*. Available from: <https://www.who.int/news-room/detail/29-06-2020-covidtimeline>.
2. Koh, D., *COVID-19 lockdowns throughout the world*. Occupational Medicine, 2020. **70**(5): p. 322-322.
3. Sharma, M., et al., *Understanding the effectiveness of government interventions against the resurgence of COVID-19 in Europe*. Nature communications, 2021. **12**(1): p. 5820.
4. Flaxman, S., et al., *Estimating the effects of non-pharmaceutical interventions on COVID-19 in Europe*. Nature, 2020. **584**(7820): p. 257-261.
5. von Schneidemesser, E., et al., *Learning from the COVID-19 lockdown in berlin: Observations and modelling to support understanding policies to reduce NO2*. Atmospheric Environment: X, 2021. **12**: p. 100122.
6. Ullrich, A., et al., *Impact of the COVID-19 pandemic and associated non-pharmaceutical interventions on other notifiable infectious diseases in Germany: An analysis of national surveillance data during week 1 &#x2013;2016 &#x2013; week 32 &#x2013;2020*. The Lancet Regional Health – Europe, 2021. **6**.
7. Brauner, J.M., et al., *Inferring the effectiveness of government interventions against COVID-19*. Science, 2021. **371**(6531): p. eabd9338.
8. Bennett, G., et al., *The impact of lockdown during the COVID-19 outbreak on dietary habits in various population groups: a scoping review*. Frontiers in nutrition, 2021. **8**: p. 626432.
9. Mekanna, A.N., S.K. Panchal, and L. Li, *Beyond lockdowns: a systematic review of the impacts of COVID-19 lockdowns on dietary pattern, physical activity, body weight, and food security*. Nutrition Reviews, 2022.

10. Barrea, L., et al., *Does Sars-Cov-2 threaten our dreams? Effect of quarantine on sleep quality and body mass index*. J Transl Med, 2020. **18**(1): p. 318.
11. Di Santo, S.G., et al., *The effects of COVID-19 and quarantine measures on the lifestyles and mental health of people over 60 at increased risk of dementia*. Frontiers in psychiatry, 2020. **11**: p. 578628.
12. Rodríguez-Pérez, C., et al., *Changes in Dietary Behaviours during the COVID-19 Outbreak Confinement in the Spanish COVIDiet Study*. Nutrients, 2020. **12**(6).
13. Urhan, M. and E. Okut Aysin, *Nutritional and health behaviour predictors of the weight gain during the COVID-19 pandemic*. European Journal of Nutrition, 2022: p. 1-10.
14. Bakaloudi, D.R., et al., *Impact of the first COVID-19 lockdown on body weight: A combined systematic review and a meta-analysis*. Clinical Nutrition, 2022. **41**(12): p. 3046-3054.
15. Khan, M.A.B., et al., *Systematic review of the effects of pandemic confinements on body weight and their determinants*. British Journal of Nutrition, 2022. **127**(2): p. 298-317.
16. Zeigler, Z., *COVID-19 Self-quarantine and Weight Gain Risk Factors in Adults*. Curr Obes Rep, 2021. **10**(3): p. 423-433.
17. Ghanem, J., et al., *Lockdown Effect on Elderly Nutritional Health*. Journal of Clinical Medicine, 2021. **10**(21): p. 5052.
18. Decaria, J.E., C. Sharp, and R.J. Petrella, *Scoping review report: obesity in older adults*. Int J Obes (Lond), 2012. **36**(9): p. 1141-50.
19. Keller, H.H. and T. Østbye, *Body Mass Index (BMI), BMI change and mortality in community-dwelling seniors without dementia*. J Nutr Health Aging, 2005. **9**(5): p. 316-20.

20. Bertram, L., et al., *Cohort profile: The Berlin Aging Study II (BASE-II)*. Int J Epidemiol, 2014. **43**(3): p. 703-12.
21. Demuth, I., et al., *Cohort profile: follow-up of a Berlin Aging Study II (BASE-II) subsample as part of the GendAge study*. BMJ Open, 2021. **11**(6): p. e045576.
22. Vandembroucke, J.P., et al., *Strengthening the Reporting of Observational Studies in Epidemiology (STROBE): explanation and elaboration*. Epidemiology, 2007. **18**(6): p. 805-35.
23. von Elm, E., et al., *The Strengthening the Reporting of Observational Studies in Epidemiology (STROBE) statement: guidelines for reporting observational studies*. Lancet, 2007. **370**(9596): p. 1453-7.
24. Pohrt, A., et al., *Differentiating Sex and Gender Among Older Men and Women*. Psychosomatic Medicine, 2022. **84**(3).
25. Topolski, T.D., et al., *The Rapid Assessment of Physical Activity (RAPA) among older adults*. Preventing chronic disease, 2006. **3**(4): p. A118-A118.
26. Vetter, V.M., et al., *Self-reported and accelerometer-based assessment of physical activity in older adults: results from the Berlin Aging Study II*. Scientific Reports, 2023. **13**(1): p. 10047.
27. San Antonio, T.P.C., *Wechsler Adult Intelligence Scale - Revised*. 1981.
28. Spira, D., et al., *Sex-specific differences in the association of vitamin D with low lean mass and frailty—Results from the Berlin Aging Study II*. Nutrition, 2018.
29. Fried, L.P., et al., *Frailty in older adults: evidence for a phenotype*. The Journals of Gerontology Series A: Biological Sciences and Medical Sciences, 2001. **56**(3): p. M146-M157.
30. Rockwood, K. and A. Mitnitski, *Frailty in relation to the accumulation of deficits*. J Gerontol A Biol Sci Med Sci, 2007. **62**(7): p. 722-7.

31. Collaboration, E.C.R. and S.w. group, *SCORE2 risk prediction algorithms: new models to estimate 10-year risk of cardiovascular disease in Europe*. *European Heart Journal*, 2021. **42**(25): p. 2439-2454.
32. *SCORE2-OP risk prediction algorithms: estimating incident cardiovascular event risk in older persons in four geographical risk regions*. *European Heart Journal*, 2021. **42**(25): p. 2455-2467.
33. Care, D., *Care in Diabetesd2019*. *Diabetes care*, 2019. **42**(1): p. S13-S28.
34. Alberti, K.G., et al., *Harmonizing the metabolic syndrome: a joint interim statement of the International Diabetes Federation Task Force on Epidemiology and Prevention; National Heart, Lung, and Blood Institute; American Heart Association; World Heart Federation; International Atherosclerosis Society; and International Association for the Study of Obesity*. *Circulation*, 2009. **120**(16): p. 1640-5.
35. Grubb, A., et al., *Generation of a new cystatin C-based estimating equation for glomerular filtration rate by use of 7 assays standardized to the international calibrator*. *Clin Chem*, 2014. **60**(7): p. 974-86.
36. Meyer, A., et al., *Leukocyte telomere length is related to appendicular lean mass: cross-sectional data from the Berlin Aging Study II (BASE-II)*. *Am J Clin Nutr*, 2016. **103**(1): p. 178-83.
37. Charlson, M.E., et al., *A new method of classifying prognostic comorbidity in longitudinal studies: development and validation*. *J Chronic Dis*, 1987. **40**(5): p. 373-83.
38. Vetter, V.M., et al., *Epigenetic clock and relative telomere length represent largely different aspects of aging in the Berlin Aging Study II (BASE-II)*. *J Gerontol A Biol Sci Med Sci*, 2018.
39. Lu, A.T., et al., *DNA methylation GrimAge strongly predicts lifespan and healthspan*. *Aging (Albany NY)*, 2019. **11**(2): p. 303.

40. Vetter, V.M., et al., *Relationship Between 5 Epigenetic Clocks, Telomere Length, and Functional Capacity Assessed in Older Adults: Cross-Sectional and Longitudinal Analyses*. *The Journals of Gerontology: Series A*, 2022. **77**(9): p. 1724-1733.
41. Lu, A.T., et al., *DNA methylation-based estimator of telomere length*. *Aging (Albany NY)*, 2019. **11**(16): p. 5895.
42. Watson, D. and L.A. Clark, *The PANAS-X: Manual for the positive and negative affect schedule-expanded form*. 1994.
43. Düzel, S., et al., *Structural brain correlates of loneliness among older adults*. *Scientific reports*, 2019. **9**(1): p. 13569.
44. Russell, D., et al., *Social and emotional loneliness: an examination of Weiss's typology of loneliness*. *Journal of personality and social psychology*, 1984. **46**(6): p. 1313.
45. Drewelies, J., et al., *Age trajectories of perceptual speed and loneliness: separating between-person and within-person associations*. *The Journals of Gerontology: Series B*, 2022. **77**(1): p. 118-129.
46. Lang, F.R., O. Lüdtke, and J.B. Asendorpf, *Testgüte und psychometrische Äquivalenz der deutschen Version des Big Five Inventory (BFI) bei jungen, mittelalten und alten Erwachsenen*. *Diagnostica*, 2001. **47**(3): p. 111-121.
47. Mueller, S., et al., *Personality development in old age relates to physical health and cognitive performance: Evidence from the Berlin Aging Study II*. *Journal of Research in Personality*, 2016. **65**: p. 94-108.
48. Cohen, S., T. Kamarck, and R. Mermelstein, *A global measure of perceived stress*. *Journal of health and social behavior*, 1983: p. 385-396.
49. van Buuren, S. and K. Groothuis-Oudshoorn, *mice: Multivariate Imputation by Chained Equations in R*. *Journal of Statistical Software*, 2011. **45**(3): p. 1 - 67.
50. Team, R.C., *R: A language and environment for statistical computing*. R Foundation for Statistical Computing, Vienna, Austria. URL <https://www.R-project.org>, 2022.

51. Wickham, H., *Elegant graphics for data analysis (ggplot2)*. 2009, New York, NY: Springer-Verlag.
52. Peter, R.S., et al., *Change in Height, Weight, and body mass index: Longitudinal data from A ustria*. *American Journal of Human Biology*, 2014. **26**(5): p. 690-696.



**Table 1: Descriptive statistics of age and body weight of the subsample of BASE-II participants that provided information at all four timepoints (n=228).**

| Timepoint            | Variable                              | Women (n=111) |       |        |        | Men (n=117) |       |        |        | p-value |
|----------------------|---------------------------------------|---------------|-------|--------|--------|-------------|-------|--------|--------|---------|
|                      |                                       | mean          | sd    | min    | max    | mean        | sd    | min    | max    |         |
| T0                   | Age (years)                           | 67.01         | 2.71  | 61.30  | 73.30  | 67.64       | 3.39  | 60.40  | 77.30  | 0.122   |
|                      | Body weight (kg)                      | 67.49         | 11.27 | 49.00  | 103.30 | 81.99       | 10.60 | 60.50  | 120.00 | 0.000   |
| T1                   | Age (years)                           | 74.64         | 3.08  | 67.10  | 82.70  | 74.58       | 3.80  | 65.80  | 85.90  | 0.895   |
|                      | Body weight (kg)                      | 67.01         | 11.35 | 43.00  | 106.00 | 80.40       | 10.62 | 60.00  | 117.00 | 0.000   |
| Online Survey        | Age (years)                           | 76.10         | 3.05  | 68.60  | 83.60  | 76.10       | 3.79  | 68.20  | 87.70  | 0.994   |
|                      | Body weight (kg)                      | 66.30         | 11.54 | 45.00  | 100.00 | 80.12       | 10.31 | 60.00  | 115.00 | 0.000   |
| T2a                  | Age (years)                           | 77.40         | 2.98  | 70.20  | 85.20  | 77.37       | 3.59  | 69.80  | 88.80  | 0.952   |
|                      | Body weight (kg)                      | 66.24         | 11.39 | 43.00  | 103.00 | 80.40       | 11.01 | 61.00  | 130.00 | 0.000   |
| T0 to T1             | Body weight change (kg)               | -0.48         | 3.59  | -10.00 | 6.50   | -1.59       | 5.32  | -21.50 | 15.50  | 0.068   |
|                      | Body weight change per year (kg/year) | -0.07         | 0.51  | -1.70  | 1.20   | -0.21       | 0.75  | -3.10  | 2.50   | 0.106   |
|                      | Body weight change CAGR (%)           | -0.11         | 0.77  | -2.90  | 1.90   | -0.26       | 0.91  | -3.30  | 3.20   | 0.170   |
| T1 to Online Survey  | Body weight change (kg)               | -0.71         | 2.79  | -11.00 | 7.00   | -0.27       | 3.52  | -19.00 | 13.00  | 0.300   |
|                      | Body weight change per year (kg/year) | -0.48         | 2.06  | -6.80  | 6.60   | -0.29       | 2.65  | -16.10 | 12.90  | 0.563   |
|                      | Body weight change CAGR (%)           | -0.74         | 3.08  | -10.20 | 9.40   | -0.25       | 3.42  | -17.70 | 21.80  | 0.259   |
| Online Survey to T2a | Weight change (kg)                    | -0.06         | 2.74  | -14.00 | 10.00  | 0.28        | 3.76  | -13.00 | 20.00  | 0.446   |
|                      | Weight change per year (kg/year)      | -0.05         | 2.15  | -10.30 | 7.80   | 0.66        | 4.88  | -8.20  | 43.20  | 0.159   |
|                      | Weight change CAGR (%)                | -0.02         | 3.10  | -13.80 | 12.10  | 0.93        | 7.37  | -8.60  | 72.10  | 0.212   |

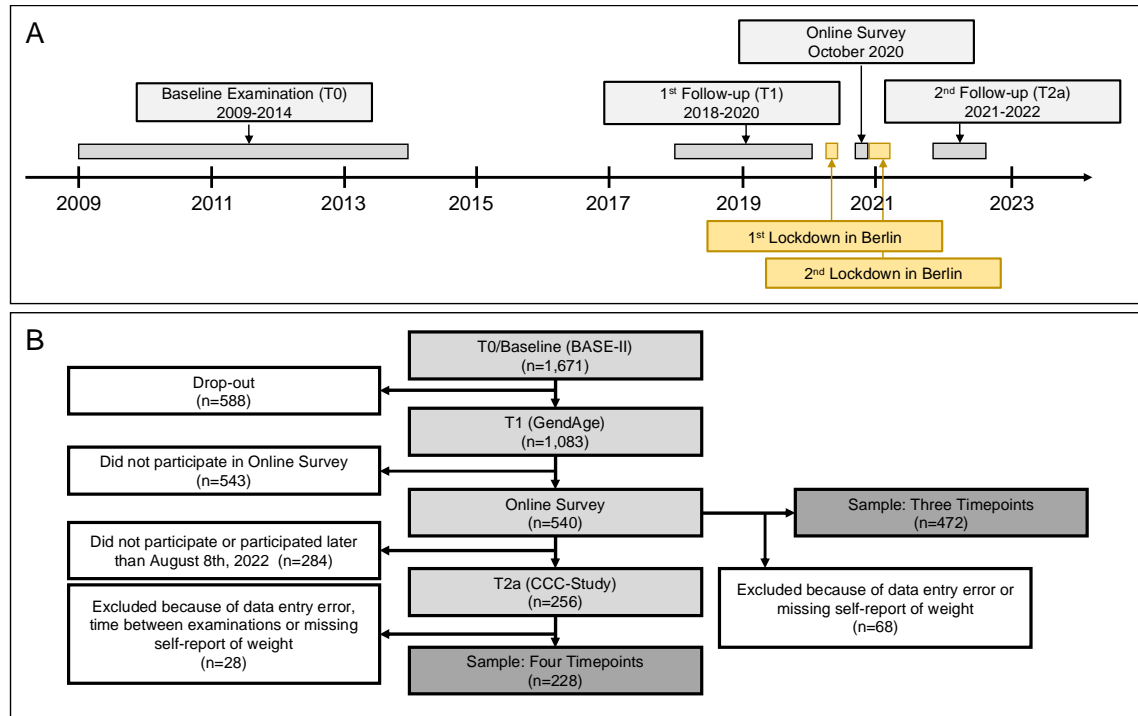

Figure 1: A: Timeline visualizing baseline, first follow-up examination, Online Survey and second follow-up examination of the BASE-II cohort. B: Flowchart illustrating how the final sample including three and four timepoints was defined.

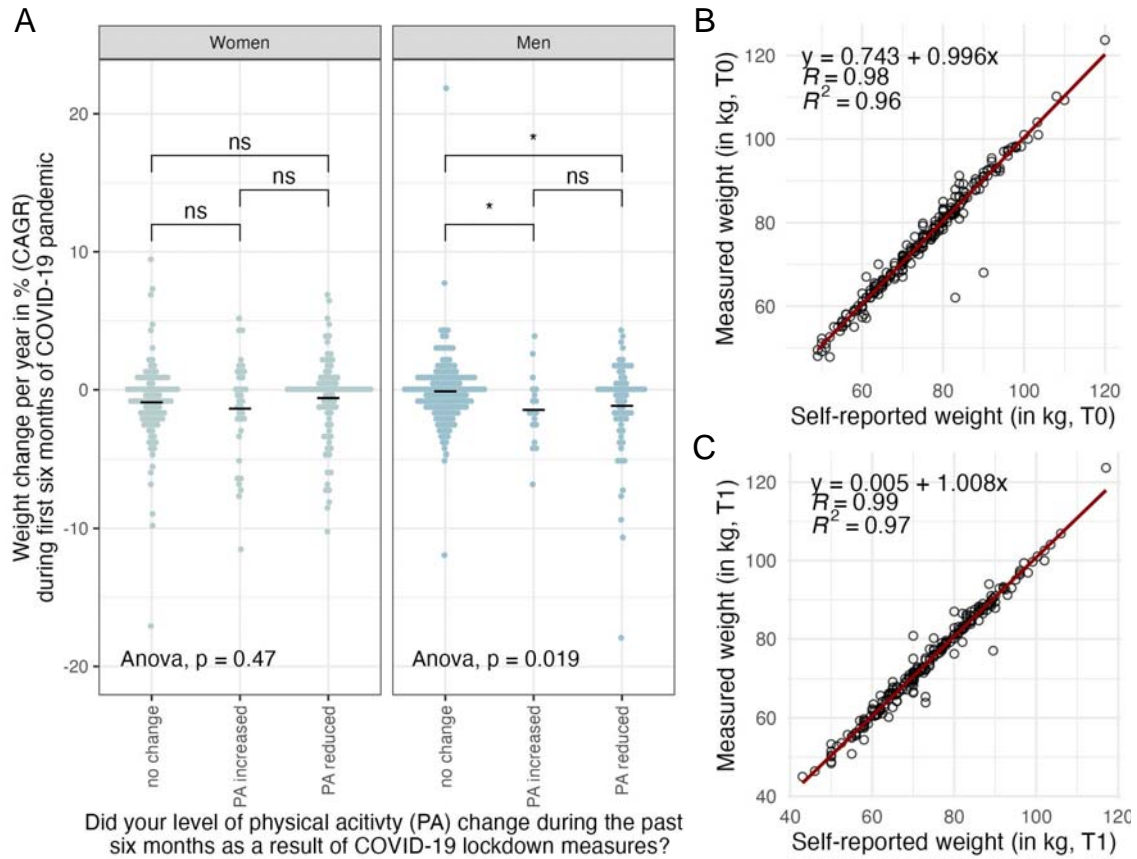

Figure 2: A: Boxplot displaying the difference in weight change stratified by self-reported change in physical activity during the first six months of COVID-19 lockdown. B and C: Scatterplots illustrating the high correlation between measured and self-reported weight during baseline (T0) and first follow-up (T1) examination. Note: kg: kilogram; CAGR: compound annual growth rate, T0: baseline examination, T1: first follow-up examination; Onl. Surv.: Online Survey; T2: second follow-up examination.

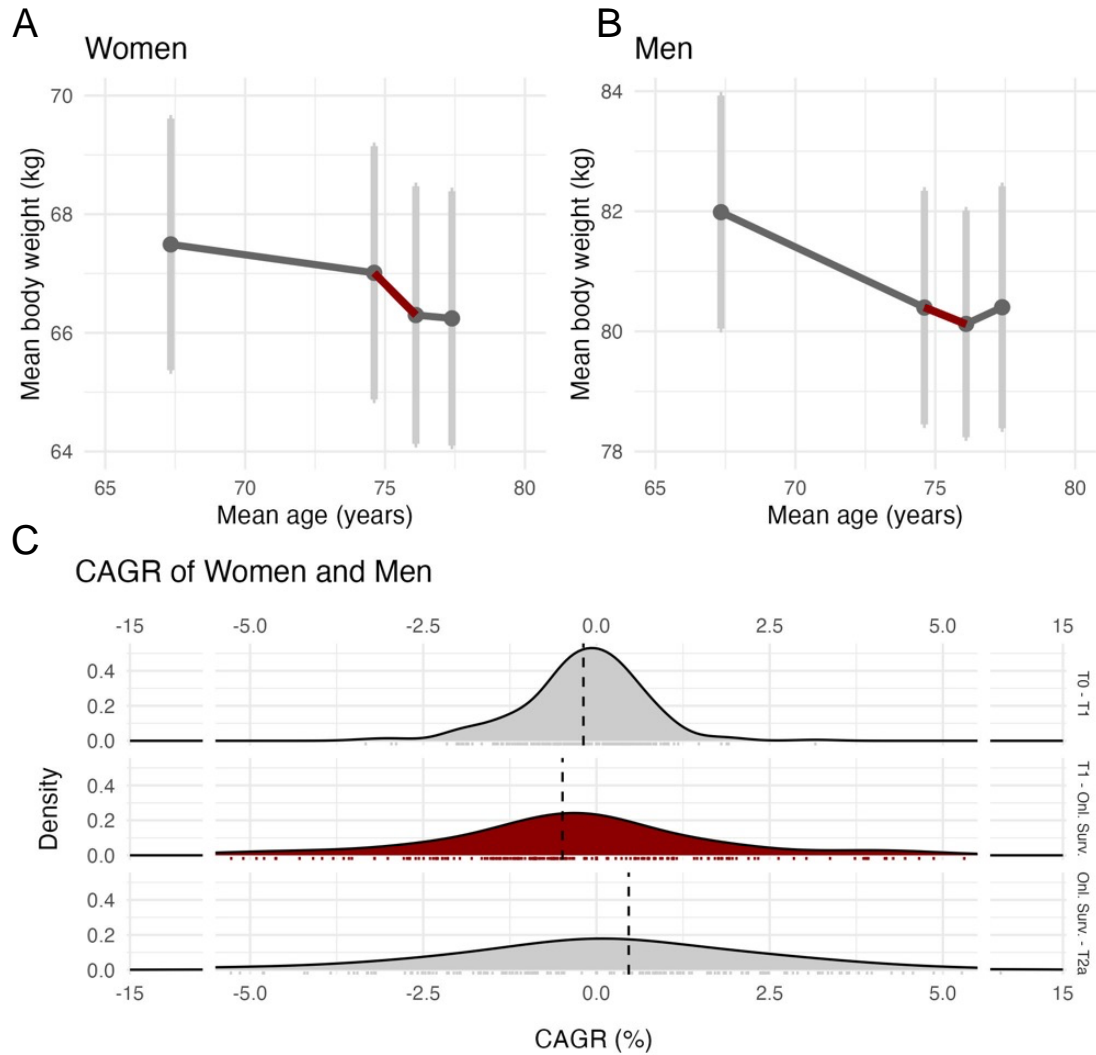

Figure 3: Mean and 95% CI of BASE-II participants body weight at T0, T1, online survey, and T2a (n=227) stratified for subgroups of women (A) and men (B). Density curves of CAGR (Change in body weight per year in percent) between T0/T1, T1/ Online Survey, and Online Survey/T2 for women and men (C). Note: kg: kilogram; CAGR: compound annual growth rate, T0: baseline examination, T1: first follow-up examination; Onl. Surv.: Online Survey; T2: second follow-up examination.

A

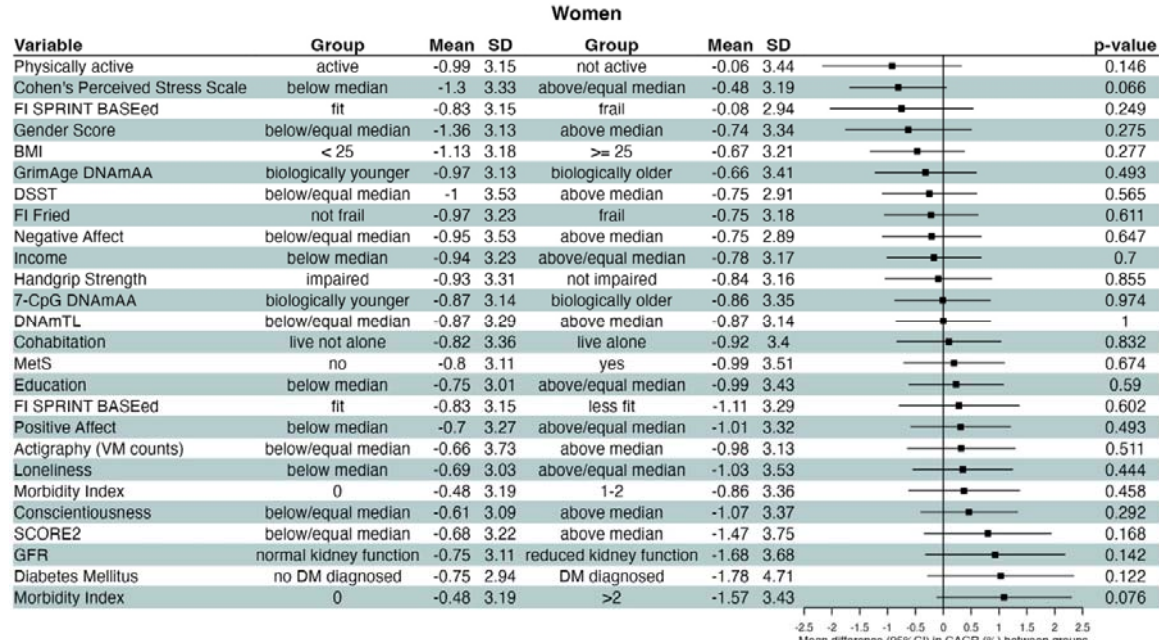

B

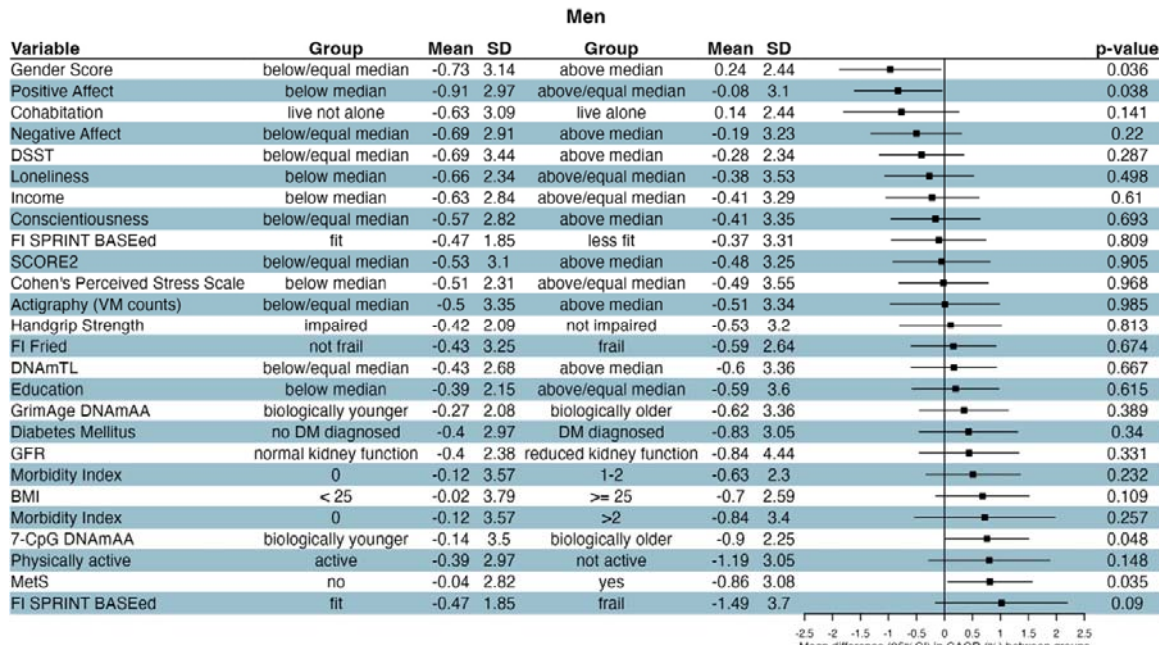

Figure 4: Forest plot of mean difference and 95% CI between CAGR (%) between groups defined by general characteristics, physical activity, geriatric assessments, chronic disease, biomarkers of aging, and psychosocial parameters. Note: DSST: Digit Symbol Substitution Test; DNAmAA: DNA methylation age acceleration; DNAmTL: DNA methylation telomere length; VM: Vector Magnitude; GFR: glomerular filtration rate; BMI: Body Mass Index; MetS: Metabolic Syndrome; FI: Frailty Index; DNAmAA: DNA methylation age

acceleration; DNAmTL: DNA methylation telomere length; CAGR: compound annual growth rate.
